# Supplementary material
Source: PubMed Central journal article supplement (PMC7262223)
Supplement: jnm236059SupplementalData.pdf [file jnm236059SupplementalData.pdf]

**Supplemental Table 1. Immunoreactive score and IRS classification of pathological PSMA expression.**

| <b>Percentage of positive cells</b> | <b>Intensity of staining</b> | <b>IRS score (0-12)</b> | <b>IRS classification</b> |
|-------------------------------------|------------------------------|-------------------------|---------------------------|
| 0 = no positive cells               | 0 = no colour reaction       | 0-1 = negative          | 0 = negative              |
| 1 = < 10% positive cells            | 1 = mild reaction            | 2-3 = mild              | 1 = mild                  |
| 2 = 10-50% positive cells           | 2 = moderate reaction        | 4-8 = moderate          | 2 = moderate              |
| 3 = 51-80% positive cells           | 3 = intense reaction         | 9-12 = strong           | 3 = strong                |
| 4 = > 80% positive cells            |                              |                         |                           |

IRS score was derived with percentage of positive cells multiplying intensity of staining. IRS= immunoreactive score; PSMA= prostate specific membrane antigen.
